# Supplementary material for: Molecular Modifications of the Pseudomonas Quinolone Signal in the Intermicrobial Competition with Aspergillus
Source: MDPI journal article supplement (doi:10.3390/jof7050343), 2021-04-28
Supplement: s1 [file s1]

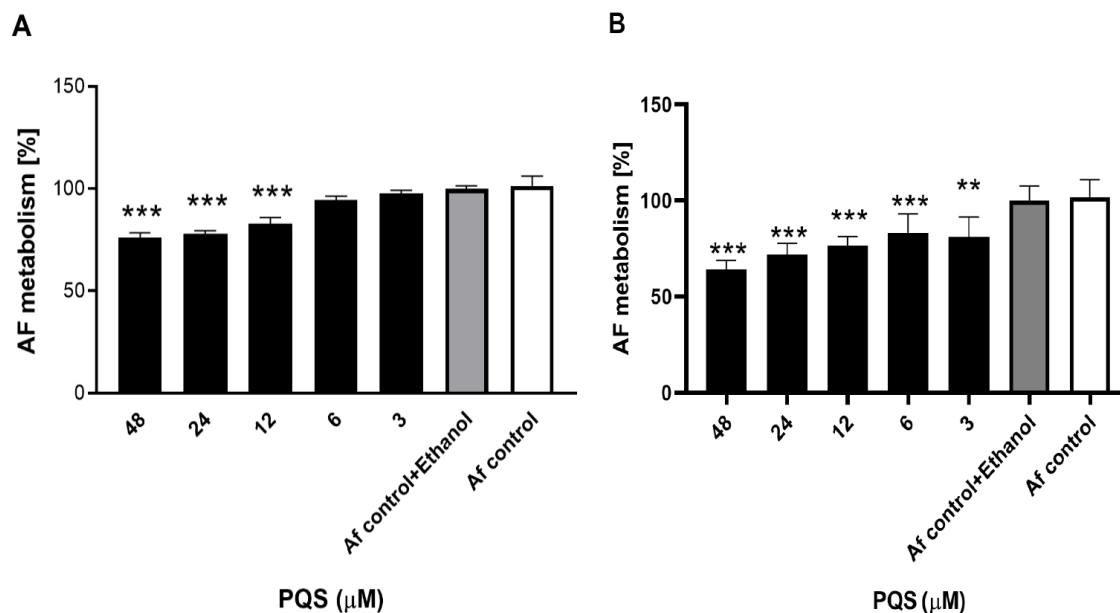

Figure S1. PQS inhibits 10AF biofilm formation. **(A)**. PQS inhibits 10AF biofilm formation. 10AF forming biofilm on plastic was incubated with two-fold dilutions of PQS or a solvent control. XTT assay, eight replicates/group were studied. PQS  $\geq 12$   $\mu\text{M}$  significantly inhibits. Three asterisks =  $p < 0.001$ , compared to controls. Concentrations 96–386  $\mu\text{M}$  also were significant at this level (not shown), with small non-significant increases in inhibition compared to PQS 12  $\mu\text{M}$ . **(B)**. PQS inhibits preformed 10AF biofilm. 10AF preformed biofilm was incubated with two-fold dilutions of PQS or a solvent (ethanol) control. The x axis numbers are  $\mu\text{M}$  PQS, XTT assay, eight replicates. PQS 3  $\mu\text{M}$  significantly inhibits, lower concentrations studied did not. Three and two asterisks =  $p < 0.001$ ,  $p < 0.01$ , respectively, compared to controls. Concentrations 96–386  $\mu\text{M}$  also were significant at  $p < 0.001$ .

With accordance of the publisher, this figure republished from Nazik, H., Sass, G., Ansari, S.R., Ertekin, R., Haas, H., Deziel, E., Stevens, D.A. Novel intermicrobial molecular interaction: *Pseudomonas aeruginosa* Quinolone Signal (PQS) modulates *Aspergillus fumigatus* response to iron. *Microbiology*. 2020;166:44–55.
